# Supplementary material for: Subcellular protein turnover in human neural progenitor cells revealed by correlative electron microscopy and nanoscale secondary ion mass spectrometry imaging
Source: Royal Society of Chemistry journal article supplement (doi:10.1039/d3sc05629e), 2024-01-01
Supplement: d3sc05629e1.pdf [file d3sc05629e1.pdf]

## Subcellular Protein Turnover in Human Neural Progenitor Cells Revealed by Correlative Electron Microscopy and Nanoscale Secondary Ion Mass Spectrometry Imaging

Alicia A. Lork <sup>a</sup>, Stefania Rabasco <sup>a</sup>, Carl Ernst <sup>b</sup>, André du Toit <sup>a</sup>, Silvio O. Rizzoli <sup>c</sup> and Nhu T. N. Phan <sup>a†</sup>

<sup>a</sup> Department of Chemistry and Molecular Biology University of Gothenburg, SE-412 96 Gothenburg, Sweden

<sup>b</sup> Human Genetics, McGill University, H4H1R3 Montreal, Canada

<sup>c</sup> Department of Neuro- and Sensory Physiology, University Medical Center Göttingen; Center for Biostructural Imaging of Neurodegeneration, Göttingen, Germany

† Corresponding author

### Supplementary Information

Equation (2) to calculate the Poisson uncertainty for each ROI:

$$\text{Poisson uncertainty (\%)} = \frac{1000}{\sqrt{\text{area (pixels)} \cdot 12C15N \left( \frac{c}{s \cdot \text{pix}} \right) \cdot \text{dwelltime (s)} \cdot \text{number of cycles}}}$$

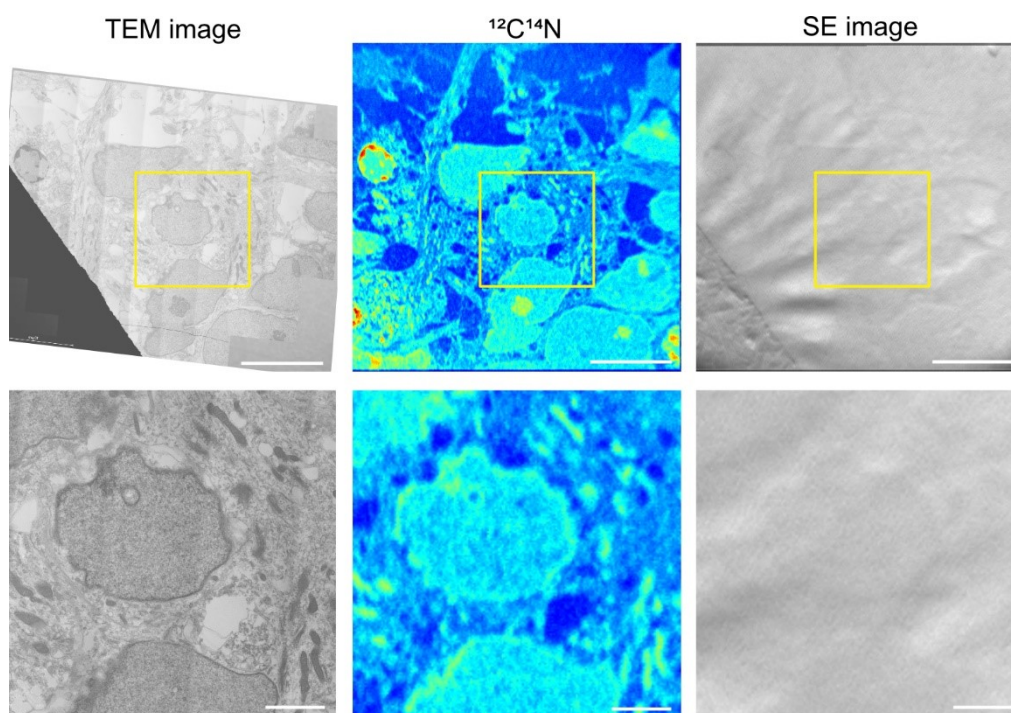

**Figure S1:** Images of cells imaged with correlative TEM and NanoSIMS. During NanoSIMS imaging in addition to detecting negatively charged ions (e.g.  $^{12}C^{14}N^-$ ) secondary electrons (SE) were also detected. TEM is used to obtain the ultrastructure of the cells,  $^{12}C^{14}N^-$  is detected within the cell and is heterogeneously distributed across the cell and the SE image shows the surface of the section

containing the cells. A zoom in of the area marked in yellow is shown below. Scale bars are 10  $\mu\text{m}$  (upper row) and 5  $\mu\text{m}$  (bottom row).

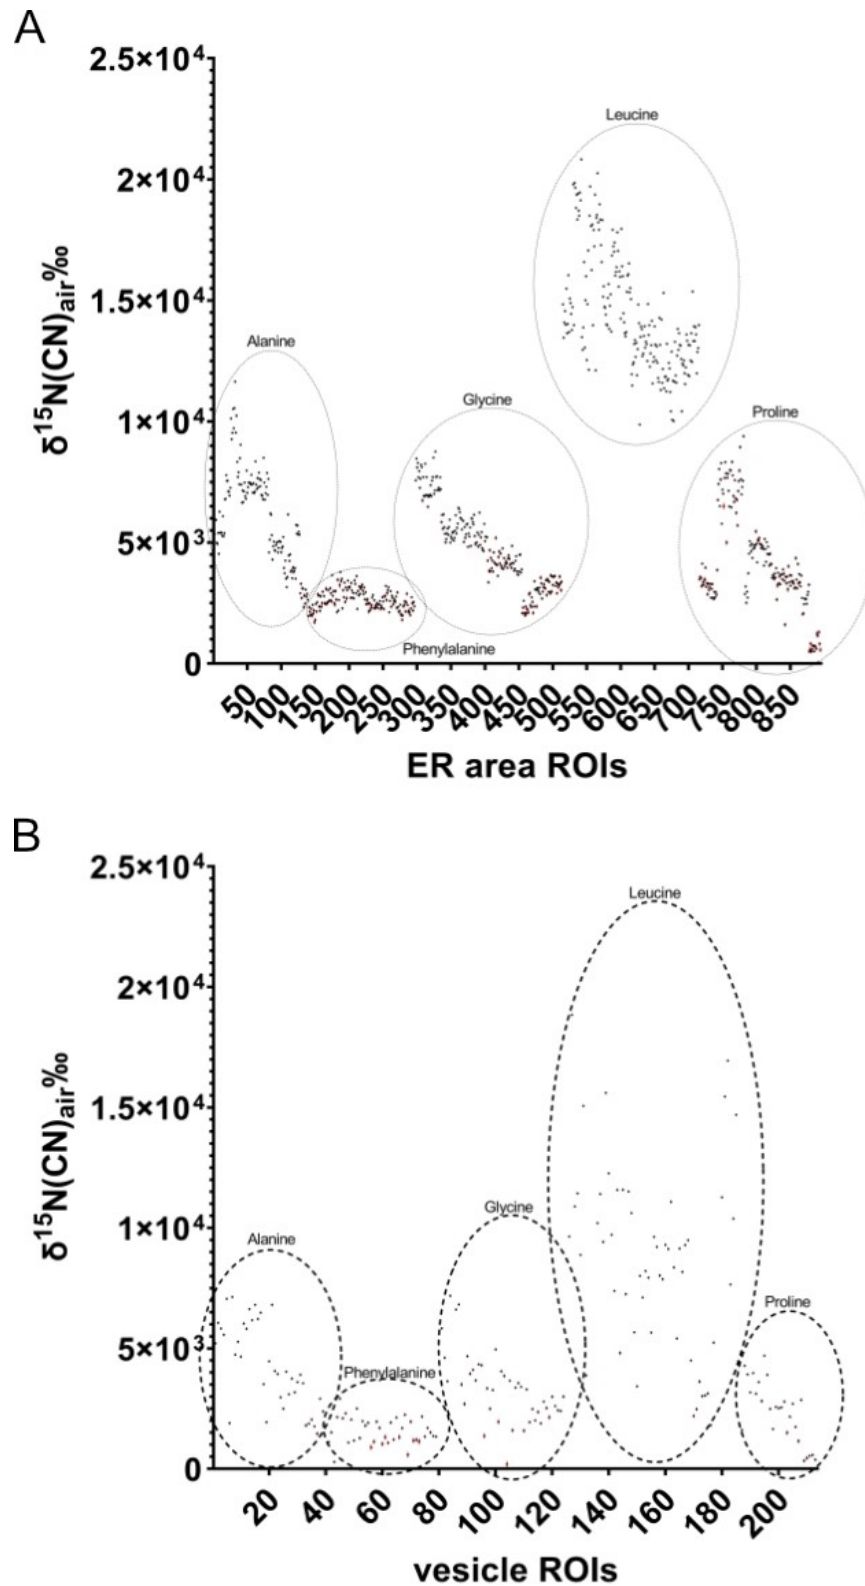

**Figure S2:**  $\delta^{15}\text{N}$  plotted with the uncertainty of each measurement (error bar in red) across all the ROIs selected in different cells for different amino acids and chase times. (A) ROIs of Endoplasmic reticulum, (B) ROIs of vesicles.

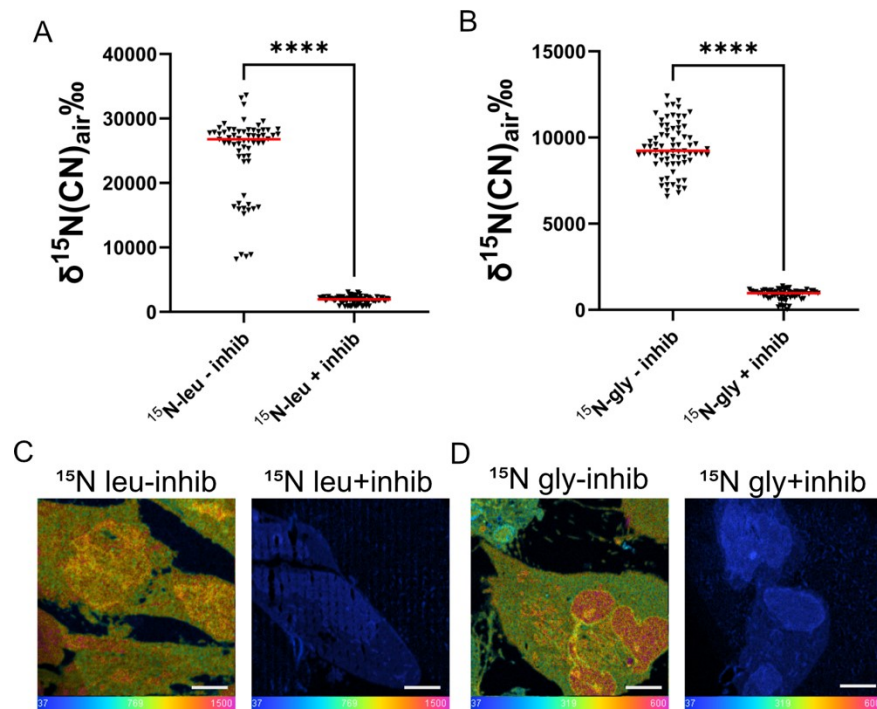

Figure S3: A-B) Comparison of the  $^{15}\text{N}$  enrichment in the control NPCs (without protein synthesis inhibitors) and NPCs treated with inhibitors for protein synthesis (0.5  $\mu\text{g}/\text{mL}$  Puromycin, 15  $\mu\text{g}/\text{mL}$  Cyclohexamide, and 50  $\mu\text{g}/\text{mL}$  geneticin, treatment with protein synthesis inhibitors started 4 h prior to isotopic amino acid incubation). A) Cells incubated with 4 mM  $^{15}\text{N}$ -leucine for 40 h. B) Cells incubated with 4 mM  $^{15}\text{N}$ -glycine for 40 h. The cells were then washed with PBS, chemically fixed, washed, embedded in resin, and cut into thin sections using the sample preparation mentioned in the Materials and Method section. Afterward, the cell slides were imaged with NanoSIMS to examine the  $^{15}\text{N}$  enrichment present in the cells. C-D)  $^{15}\text{N}/^{14}\text{N}$  NanoSIMS images of control NPCs and NPCs treated with inhibitors for protein synthesis. Two consecutive imaging planes (30x30  $\mu\text{m}$ , 256x256 pixels) were acquired with a primary current of 2.7 pA with D1-4 aperture. C) Cells incubated with  $^{15}\text{N}$ -leucine. D) Cells incubated with  $^{15}\text{N}$ -glycine. Scale bars are 5  $\mu\text{m}$ .

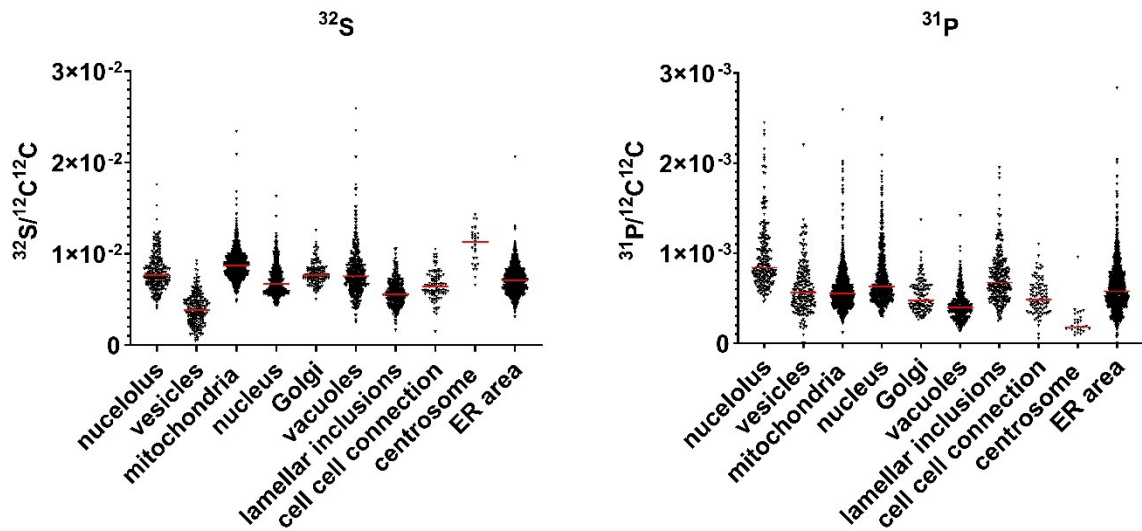

**Figure S4:** Levels of  $^{32}\text{S}$  and  $^{31}\text{P}$  in different organelles across the cells. Data was pooled from all incubation conditions and normalized to  $^{12}\text{C}_2$ . Significances are summarized in Table S1 and S2.

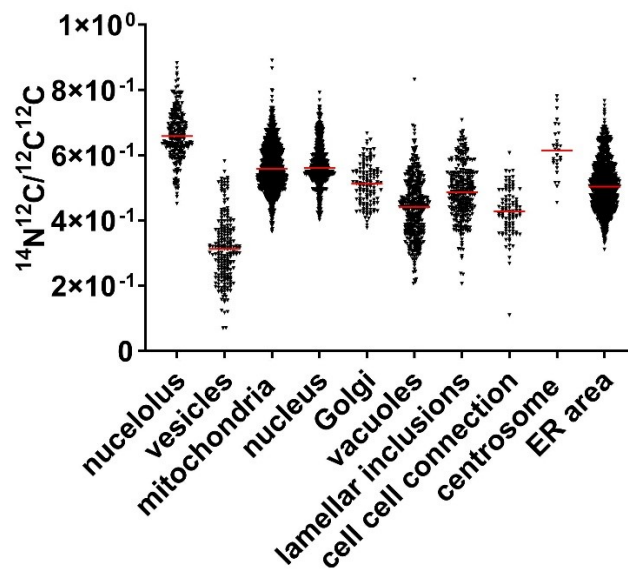

**Figure S5:** The  $^{12}\text{C}^{14}\text{N}$  levels of different organelles were determined. Nucleolus and centrosomes have the highest  $^{14}\text{N}^{12}\text{C}$  signal whereas vesicles have the lowest. The significances are summarized in Table S3.

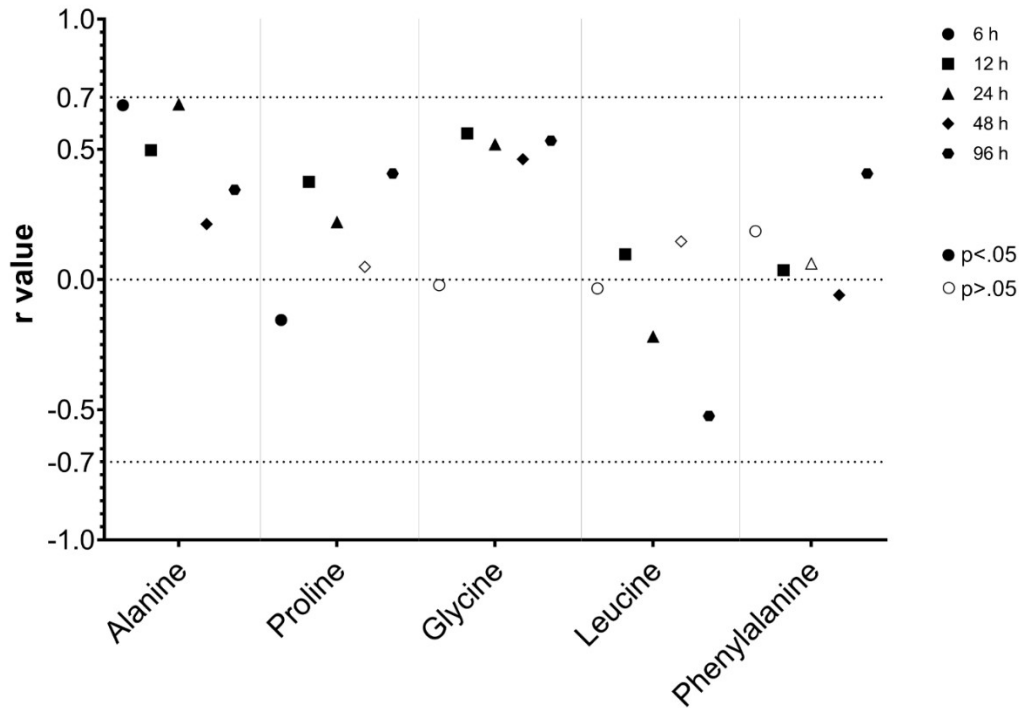

**Figure S6:** No consistent correlation is observed between  $\delta^{15}\text{N}$  and  $^{12}\text{C}^{14}\text{N}$  levels. The correlation coefficient value of each timepoint for each amino acid is plotted and the significance level of the correlation is indicated (Spearman correlation: black-filled symbols significant with  $p < 0.05$ , white-filled symbols not significant  $p > 0.05$ ).

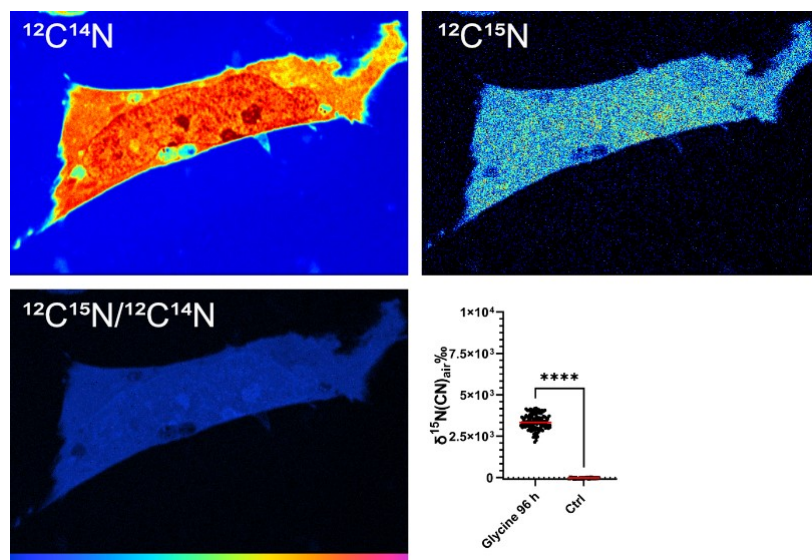

**Figure S7:** Ion images of  $^{12}\text{C}^{14}\text{N}$ ,  $^{12}\text{C}^{15}\text{N}$  and  $^{12}\text{C}^{15}\text{N}/^{12}\text{C}^{14}\text{N}$  ratio HSI (color scale from blue: 0.0037 to magenta: 0.04) of a control cell incubated in regular cell medium without  $^{15}\text{N}$ -amino acid. The  $\delta^{15}\text{N}$  levels of the whole control cell and the cells incubated with  $^{15}\text{N}$ -glycine followed by a 96 h chase period are significantly different (Mann-Whitney test;  $p < .0001$ ).  $\delta^{15}\text{N}$  levels are  $\sim 38\text{‰}$  for control whereas after 96 h of clearing time  $^{15}\text{N}$ -glycine incubated cells are at  $\sim 3300\text{‰}$

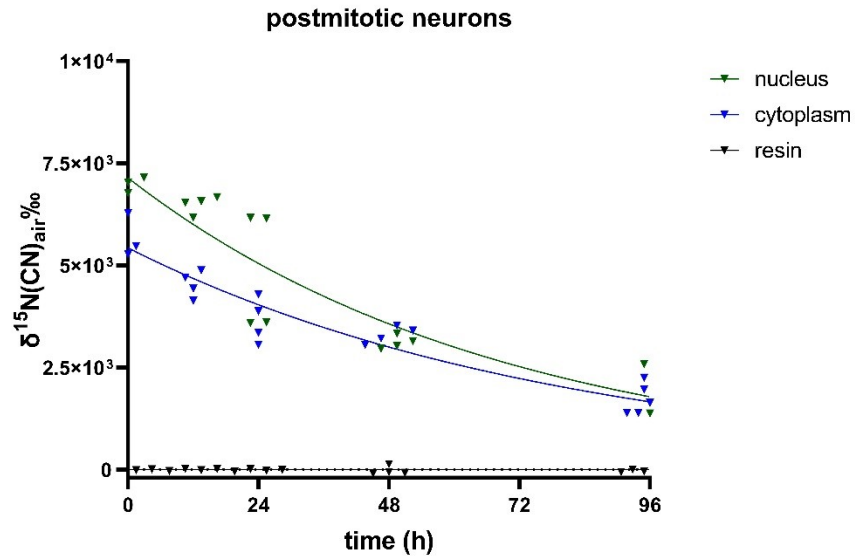

**Figure S8:** The  $^{15}\text{N}$  enrichment over 96 h chase period of postmitotic neurons differentiated from midbrain NPCs incubated with 2 mM  $^{15}\text{N}$  Glycine for 48 h on day 5 after the start of differentiation when the cell mitosis were efficiently inhibited.<sup>1</sup> For cell differentiation, NPCs were plated onto polyornithine and laminin coated Mattek dishes and medium was switched to DMEM/F12 supplemented with 2 % B27, 1 % N2, 20 ng/mL BDNF, 20 ng/mL GDNF, 200 nM Ascorbic Acid, 1 mM dibutyryl cAMP, 1  $\mu\text{g}/\text{mL}$  Laminin. Medium was exchanged partially (50:50) every two days. A one-phase decay curve is fitted with GraphPad Prism 9.3.1 software.

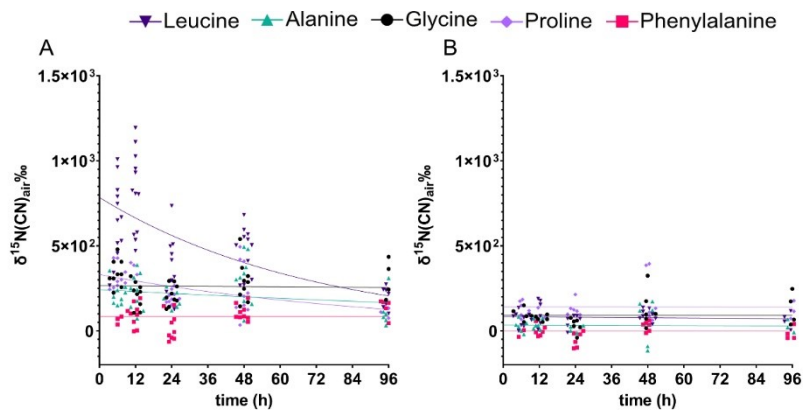

**Figure S9:**  $\delta^{15}\text{N}$  of the embedding resin surrounding the NPCs incubated with  $^{15}\text{N}$ -amino acids.  $\delta^{15}\text{N}$  levels are different in the resin next to the cell compared to that further away from the cell. A)  $\delta^{15}\text{N}$  of the resin close to the cell at different chase times. B)  $\delta^{15}\text{N}$  of the resin further away from the cell at different chase times.



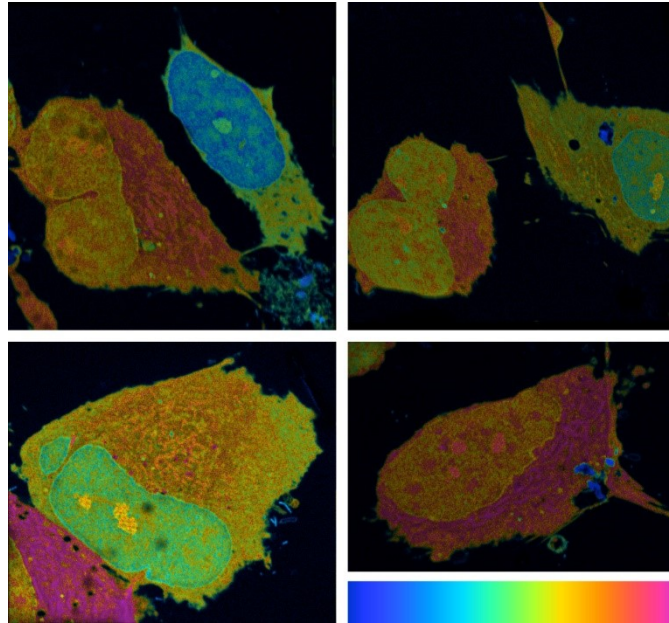

**Figure S10:** HSI images of  $^{15}\text{N}$  Leucine incubated NPCs after 6 h chase time. Substantial biological variation is seen in the  $\delta^{15}\text{N}$  between the cells. Color scale (blue to magenta) represents the ratio from 0.0037 (natural abundance) to 0.085 ( $\delta^{15}\text{N} \sim 2.2 \times 10^4 \%$ ).

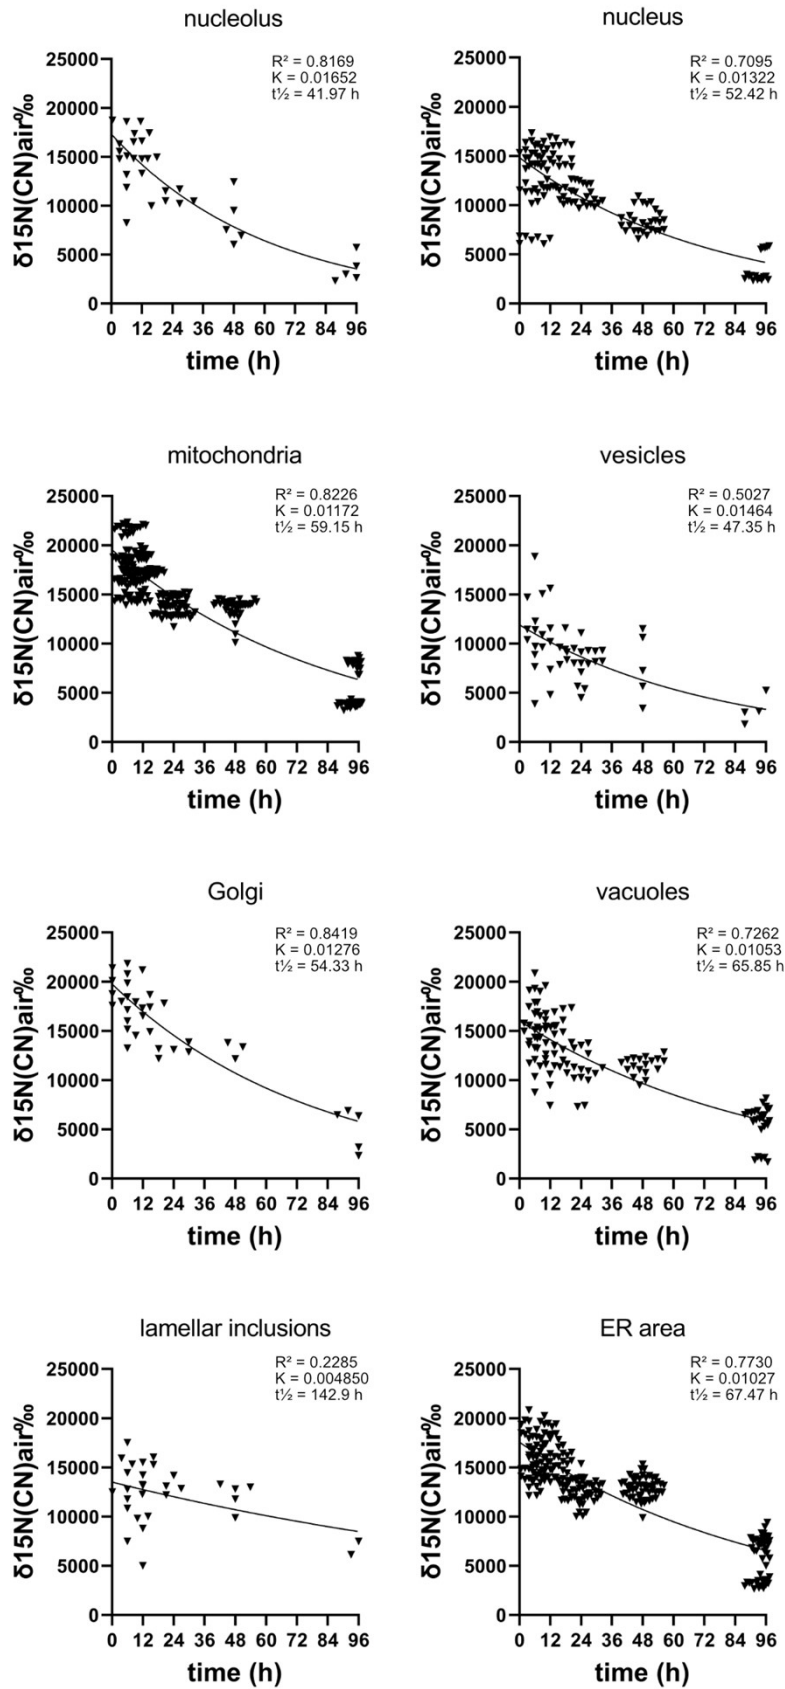

**Figure S11:**  $\delta^{15}\text{N}$  over 96h chase time in  $^{15}\text{N}$ -leucine incubated cells. A one-phase decay curve is fitted to each dataset with GraphPad Prism 9.3.1 software;  $R^2$ , rate constant  $K$  and  $t_{1/2}$  are given for each curve.



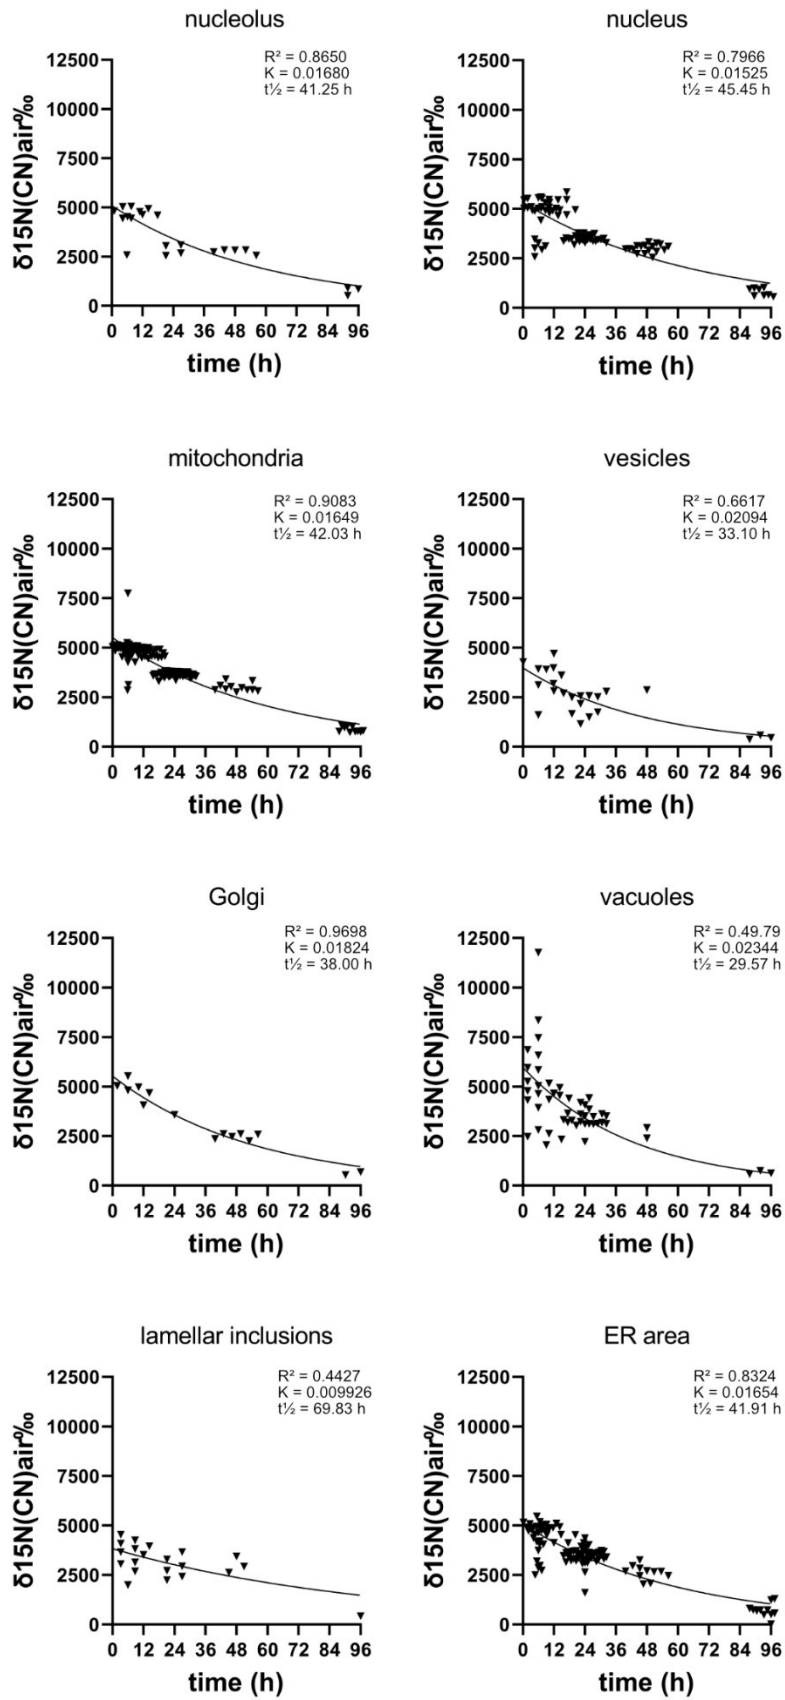

**Figure S12:**  $\delta^{15}\text{N}$  over 96h chase time in  $^{15}\text{N}$ -proline incubated cells. A one-phase decay curve is fitted to each dataset with GraphPad Prism 9.3.1 software;  $R^2$ , rate constant  $K$  and  $t_{1/2}$  are given for each curve.

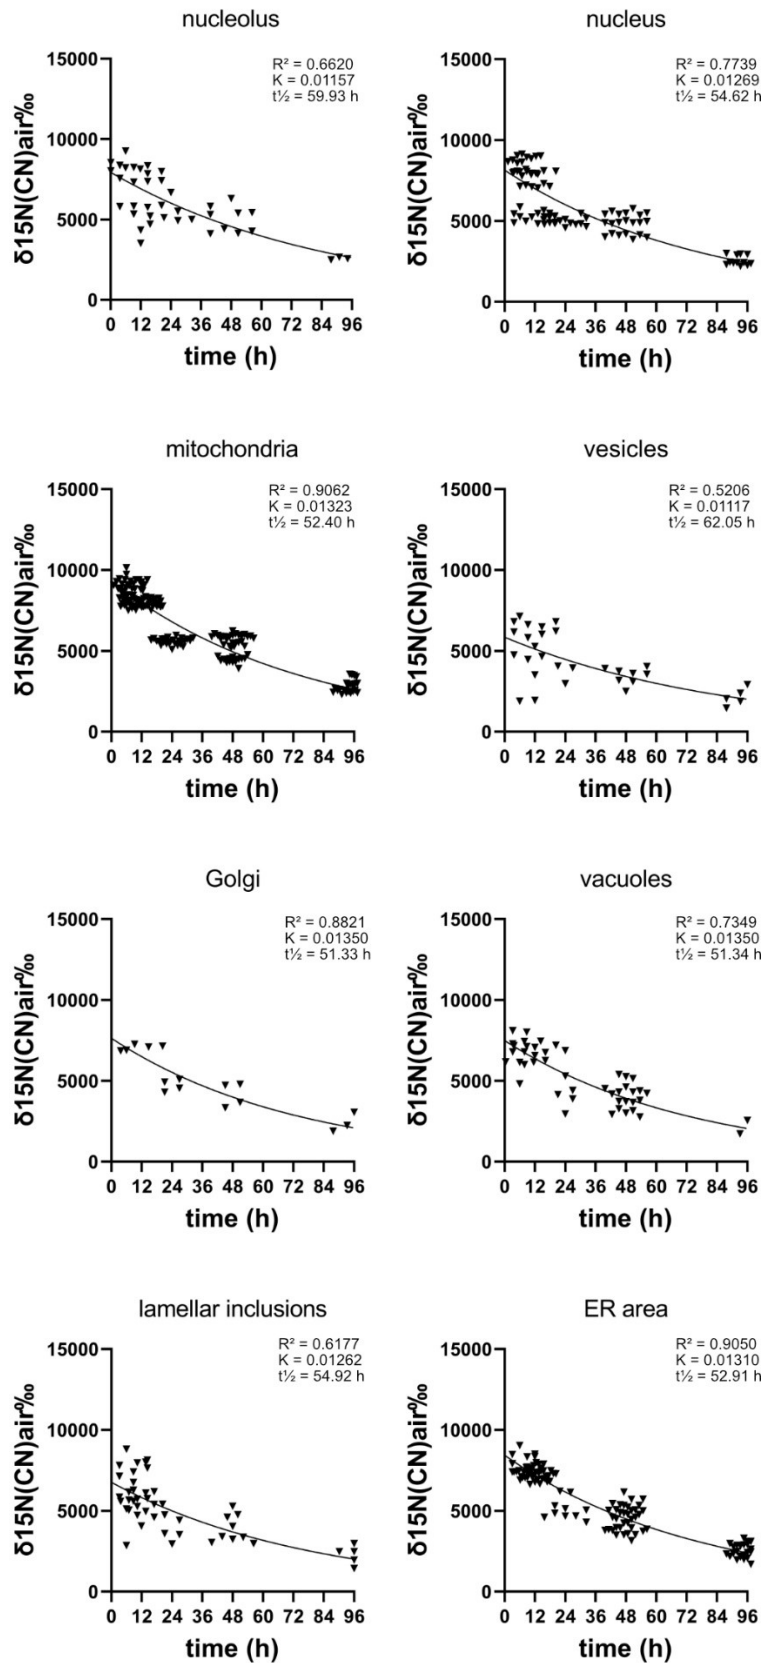

**Figure S13:**  $\delta^{15}\text{N}$  over 96h chase time in  $^{15}\text{N}$ -alanine incubated cells. A one-phase decay curve is fitted to each dataset with GraphPad Prism 9.3.1 software;  $R^2$ , rate constant  $K$  and  $t_{1/2}$  are given for each curve.

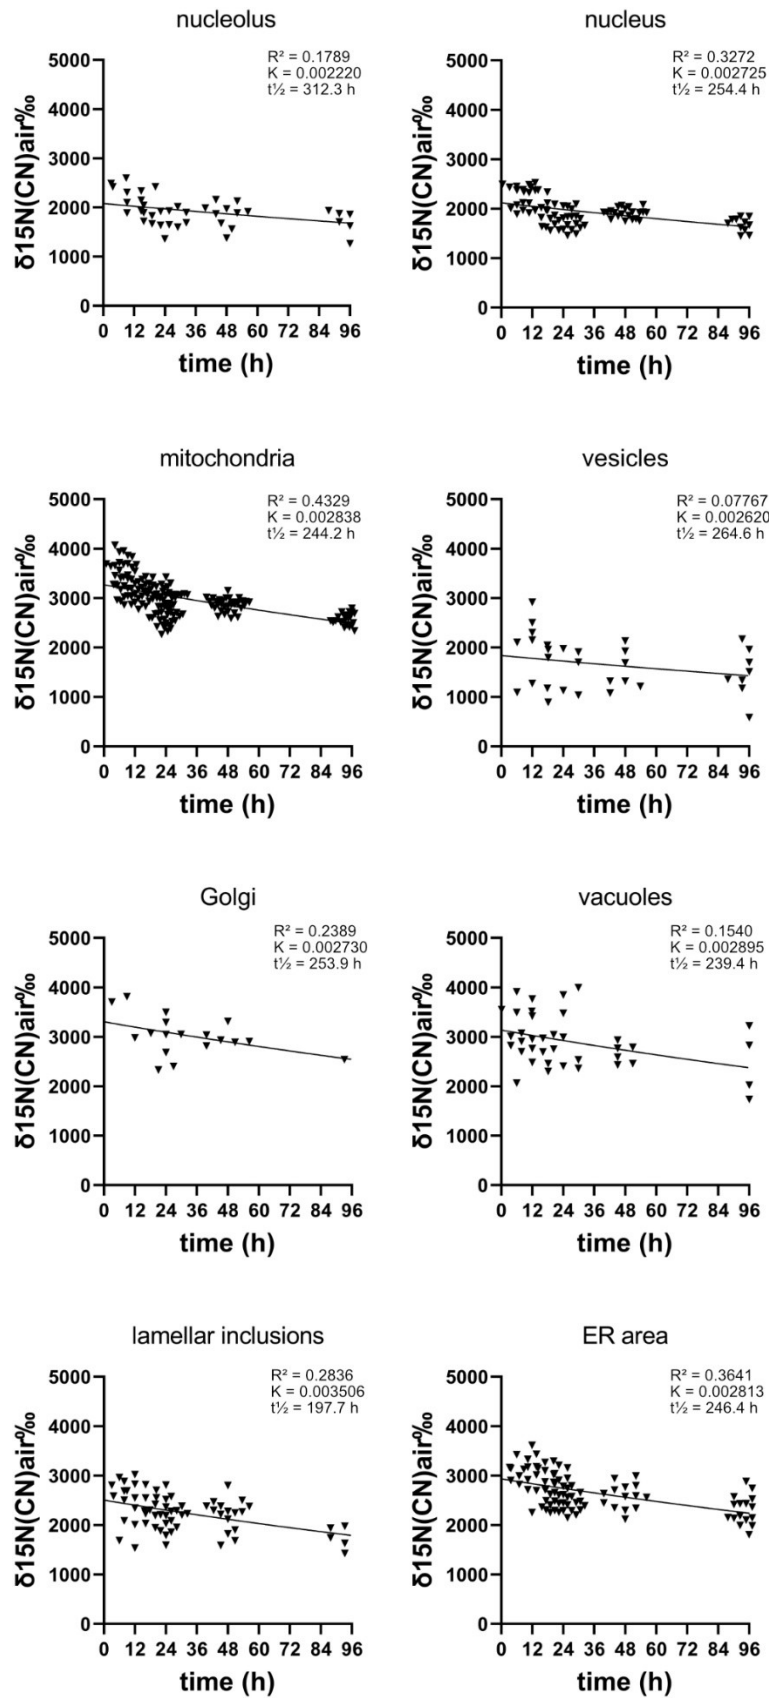

**Figure S14:**  $\delta^{15}\text{N}$  over 96h chase time in  $^{15}\text{N}$ -phenylalanine incubated cells. A one-phase decay curve is fitted to each dataset with GraphPad Prism 9.3.1 software;  $R^2$ , rate constant  $K$  and  $t_{1/2}$  are given for each curve.

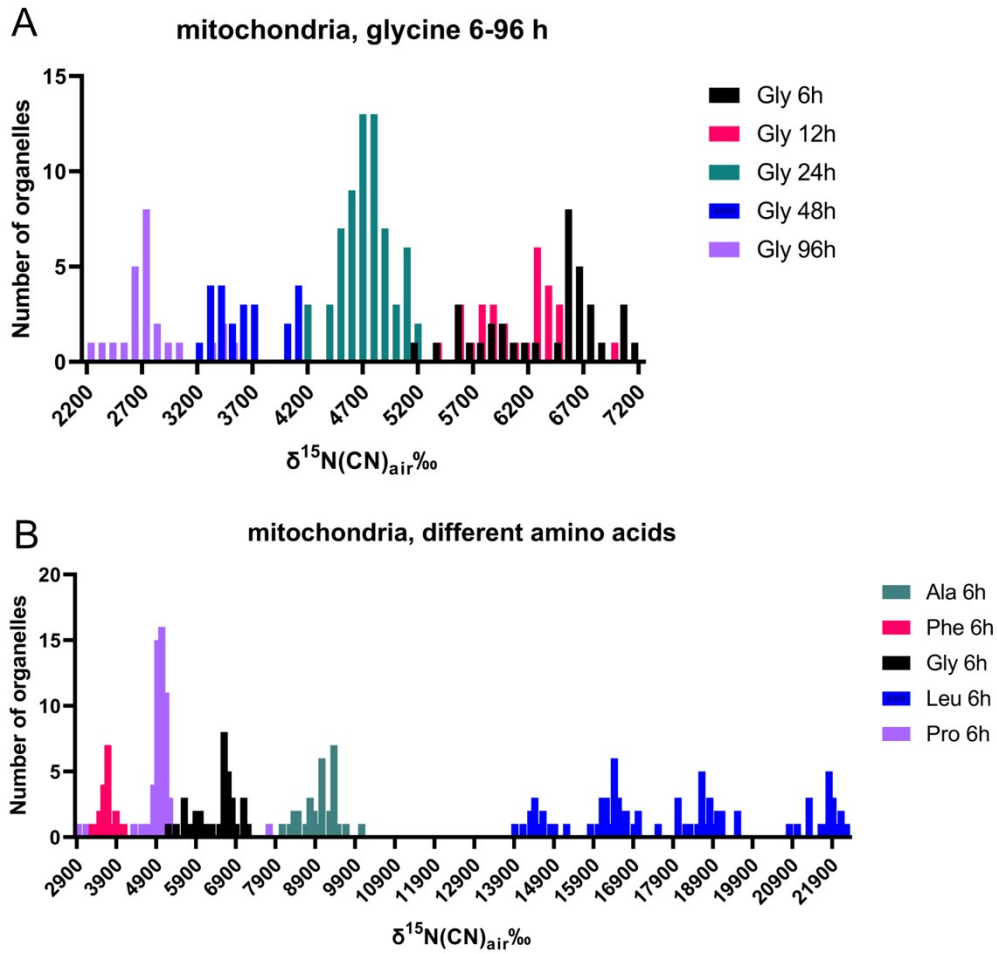

**Figure 15:** Histograms of the protein turnover of individual mitochondria from all the cells incubated with  $^{15}\text{N}$ -glycine followed by different chase periods between 6h and 96h (A), and from all the cells incubated with different  $^{15}\text{N}$ -amino acids followed by a 6h chase period (B). Ala: alanine, Phe: phenylalanine, Gly: glycine, Leu: leucine, Pro: proline.

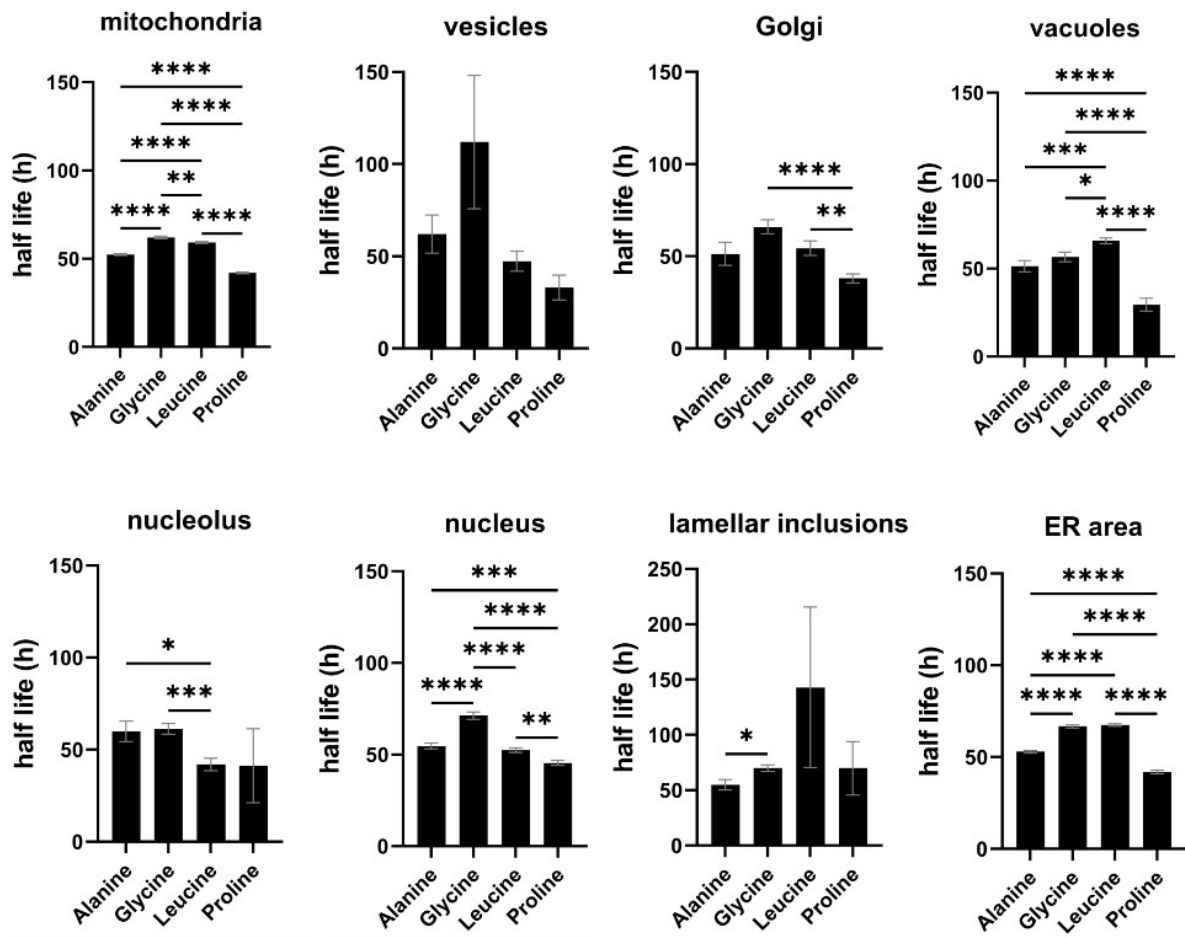

**Figure S16:** Protein half-lives of cellular organelles are significantly different corresponding to different incubated <sup>15</sup>N-amino acids. One-way ANOVA test (Brown Forsythe and Welch) was performed followed by Dunnett's multiple comparison. Significances from Dunnett's multiple comparisons for n<50 and from Games-Howell's multiple comparisons for n>50 (mitochondria, ER area, nucleus) are indicated as \* p<.05, \*\* p<.01, \*\*\* p<.001, \*\*\*\* p<.0001.

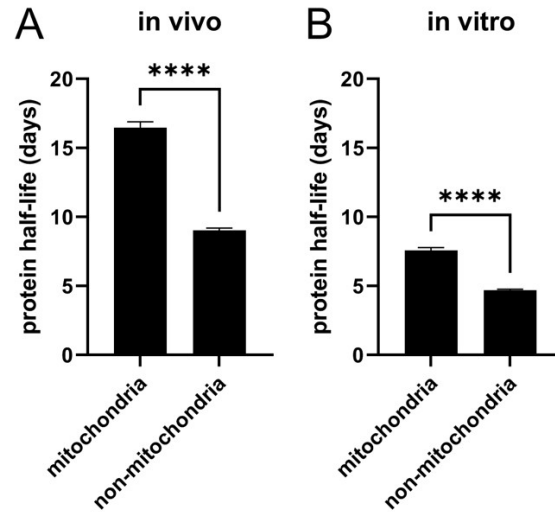

**Figure S17:** Differences between the lifetimes of proteins in mitochondria and elsewhere, from both *in vivo* data (mouse cortex)<sup>2</sup>, and *in vitro* data (cultured neurons).<sup>3</sup> Both studies showed that mitochondria proteins display a far slower turnover than other cellular components.

**Table S1:** Summary of all significances of the <sup>32</sup>S/<sup>12</sup>C<sup>12</sup>C measurements after one-way ANOVA (Kruskal Wallis, Dunn's multiple comparisons test) was performed.

| Dunn's multiple comparisons test  | Mean rank diff. | Significant? | Summary | Adjusted P Value |
|-----------------------------------|-----------------|--------------|---------|------------------|
| nucleolus vs vesicles             | 1891            | Yes          | ****    | <0.0001          |
| nucleolus vs mitochondria         | -565.7          | Yes          | ****    | <0.0001          |
| nucleolus vs nucleus              | 566             | Yes          | ****    | <0.0001          |
| nucleolus vs Golgi                | 20.35           | No           | ns      | >0.9999          |
| nucleolus vs vacuoles             | 131.1           | No           | ns      | >0.9999          |
| nucleolus vs lamellar inclusion   | 1325            | Yes          | ****    | <0.0001          |
| nucleolus vs cell cell connection | 853.6           | Yes          | ****    | <0.0001          |
| nucleolus vs centrosome           | -1247           | Yes          | ****    | <0.0001          |
| nucleolus vs ER area              | 493             | Yes          | ****    | <0.0001          |
| vesicles vs mitochondria          | -2457           | Yes          | ****    | <0.0001          |
| vesicles vs nucleus               | -1325           | Yes          | ****    | <0.0001          |
| vesicles vs Golgi                 | -1870           | Yes          | ****    | <0.0001          |
| vesicles vs vacuoles              | -1760           | Yes          | ****    | <0.0001          |
| vesicles vs lamellar inclusion    | -566            | Yes          | ****    | <0.0001          |
| vesicles vs cell cell connection  | -1037           | Yes          | ****    | <0.0001          |
| vesicles vs centrosome            | -3138           | Yes          | ****    | <0.0001          |
| vesicles vs ER area               | -1398           | Yes          | ****    | <0.0001          |
| mitochondria vs nucleus           | 1132            | Yes          | ****    | <0.0001          |
| mitochondria vs Golgi             | 586             | Yes          | ****    | <0.0001          |
| mitochondria vs vacuoles          | 696.8           | Yes          | ****    | <0.0001          |



|                                            |        |     |      |         |
|--------------------------------------------|--------|-----|------|---------|
| mitochondria vs lamellar inclusion         | 1891   | Yes | **** | <0.0001 |
| mitochondria vs cell cell connection       | 1419   | Yes | **** | <0.0001 |
| mitochondria vs centrosome                 | -681.2 | No  | ns   | 0.0753  |
| mitochondria vs ER area                    | 1059   | Yes | **** | <0.0001 |
| nucleus vs Golgi                           | -545.6 | Yes | **** | <0.0001 |
| nucleus vs vacuoles                        | -434.9 | Yes | **** | <0.0001 |
| nucleus vs lamellar inclusion              | 758.8  | Yes | **** | <0.0001 |
| nucleus vs cell cell connection            | 287.6  | No  | ns   | 0.9234  |
| nucleus vs centrosome                      | -1813  | Yes | **** | <0.0001 |
| nucleus vs ER area                         | -73.04 | No  | ns   | >0.9999 |
| Golgi vs vacuoles                          | 110.7  | No  | ns   | >0.9999 |
| Golgi vs lamellar inclusion                | 1304   | Yes | **** | <0.0001 |
| Golgi vs cell cell connection              | 833.2  | Yes | **** | <0.0001 |
| Golgi vs centrosome                        | -1267  | Yes | **** | <0.0001 |
| Golgi vs ER area                           | 472.6  | Yes | ***  | 0.0006  |
| vacuoles vs lamellar inclusion             | 1194   | Yes | **** | <0.0001 |
| vacuoles vs cell cell connection           | 722.5  | Yes | **** | <0.0001 |
| vacuoles vs centrosome                     | -1378  | Yes | **** | <0.0001 |
| vacuoles vs ER area                        | 361.9  | Yes | **** | <0.0001 |
| lamellar inclusion vs cell cell connection | -471.3 | Yes | *    | 0.019   |
| lamellar inclusion vs centrosome           | -2572  | Yes | **** | <0.0001 |
| lamellar inclusion vs ER area              | -831.9 | Yes | **** | <0.0001 |
| cell cell connection vs centrosome         | -2101  | Yes | **** | <0.0001 |
| cell cell connection vs ER area            | -360.6 | No  | ns   | 0.1306  |
| centrosome vs ER area                      | 1740   | Yes | **** | <0.0001 |

**Table S2:** Summary of all significances of the  $^{31}\text{P}/^{12}\text{C}^{12}\text{C}$  measurements after one-way ANOVA (Kruskal Wallis, Dunn's multiple comparisons test) was performed.

| Dunn's multiple comparisons test  | Mean rank diff. | Significant? | Summary | Adjusted P Value |
|-----------------------------------|-----------------|--------------|---------|------------------|
| nucelolus vs vesicles             | 1277            | Yes          | ****    | <0.0001          |
| nucelolus vs mitochondria         | 1310            | Yes          | ****    | <0.0001          |
| nucelolus vs nucleus              | 809.4           | Yes          | ****    | <0.0001          |
| nucelolus vs Golgi                | 1675            | Yes          | ****    | <0.0001          |
| nucelolus vs vacuoles             | 2217            | Yes          | ****    | <0.0001          |
| nucelolus vs lamellar inclusion   | 738.7           | Yes          | ****    | <0.0001          |
| nucelolus vs cell cell connection | 1682            | Yes          | ****    | <0.0001          |
| nucelolus vs centrosome           | 2977            | Yes          | ****    | <0.0001          |
| nucelolus vs ER area              | 1209            | Yes          | ****    | <0.0001          |
| vesicles vs                       | 32.99           | No           | ns      | >0.9999          |

|                                            |        |     |      |         |
|--------------------------------------------|--------|-----|------|---------|
| mitochondria                               |        |     |      |         |
| vesicles vs nucleus                        | -467.4 | Yes | **** | <0.0001 |
| vesicles vs Golgi                          | 398    | No  | ns   | 0.0982  |
| vesicles vs vacuoles                       | 940.2  | Yes | **** | <0.0001 |
| vesicles vs lamellar inclusion             | -538.1 | Yes | **** | <0.0001 |
| vesicles vs cell cell connection           | 404.8  | No  | ns   | 0.1777  |
| vesicles vs centrosome                     | 1700   | Yes | **** | <0.0001 |
| vesicles vs ER area                        | -67.96 | No  | ns   | >0.9999 |
| mitochondria vs nucleus                    | -500.4 | Yes | **** | <0.0001 |
| mitochondria vs Golgi                      | 365    | Yes | *    | 0.0291  |
| mitochondria vs vacuoles                   | 907.2  | Yes | **** | <0.0001 |
| mitochondria vs lamellar inclusion         | -571.1 | Yes | **** | <0.0001 |
| mitochondria vs cell cell connection       | 371.8  | No  | ns   | 0.0846  |
| mitochondria vs centrosome                 | 1667   | Yes | **** | <0.0001 |
| mitochondria vs ER area                    | -101   | No  | ns   | >0.9999 |
| nucleus vs Golgi                           | 865.3  | Yes | **** | <0.0001 |
| nucleus vs vacuoles                        | 1408   | Yes | **** | <0.0001 |
| nucleus vs lamellar inclusion              | -70.75 | No  | ns   | >0.9999 |
| nucleus vs cell cell connection            | 872.2  | Yes | **** | <0.0001 |
| nucleus vs centrosome                      | 2168   | Yes | **** | <0.0001 |
| nucleus vs ER area                         | 399.4  | Yes | **** | <0.0001 |
| Golgi vs vacuoles                          | 542.3  | Yes | ***  | 0.0002  |
| Golgi vs lamellar inclusion                | -936.1 | Yes | **** | <0.0001 |
| Golgi vs cell cell connection              | 6.848  | No  | ns   | >0.9999 |
| Golgi vs centrosome                        | 1302   | Yes | **** | <0.0001 |
| Golgi vs ER area                           | -465.9 | Yes | ***  | 0.0008  |
| vacuoles vs lamellar inclusion             | -1478  | Yes | **** | <0.0001 |
| vacuoles vs cell cell connection           | -535.4 | Yes | **   | 0.0016  |
| vacuoles vs centrosome                     | 760.2  | Yes | *    | 0.0283  |
| vacuoles vs ER area                        | -1008  | Yes | **** | <0.0001 |
| lamellar inclusion vs cell cell connection | 942.9  | Yes | **** | <0.0001 |
| lamellar inclusion vs centrosome           | 2239   | Yes | **** | <0.0001 |
| lamellar inclusion vs ER area              | 470.2  | Yes | **** | <0.0001 |
| cell cell connection vs centrosome         | 1296   | Yes | **** | <0.0001 |
| cell cell connection vs ER area            | -472.8 | Yes | **   | 0.0043  |
| centrosome vs ER area                      | -1768  | Yes | **** | <0.0001 |

**Table S3:** Summary of all significances of the  $^{12}\text{C}^{14}\text{N}/^{12}\text{C}^{12}\text{C}$  measurements after one-way ANOVA (Kruskal Wallis, Dunn's multiple comparisons test) was performed.

| Dunn's multiple comparisons test     | Mean rank diff. | Significant? | Summary | Adjusted P Value |
|--------------------------------------|-----------------|--------------|---------|------------------|
| nucelolus vs vesicles                | 3104            | Yes          | ****    | <0.0001          |
| nucelolus vs mitochondria            | 979.6           | Yes          | ****    | <0.0001          |
| nucelolus vs nucleus                 | 885             | Yes          | ****    | <0.0001          |
| nucelolus vs Golgi                   | 1668            | Yes          | ****    | <0.0001          |
| nucelolus vs vacuoles                | 2387            | Yes          | ****    | <0.0001          |
| nucelolus vs lamellar inclusion      | 1929            | Yes          | ****    | <0.0001          |
| nucelolus vs cell cell connection    | 2614            | Yes          | ****    | <0.0001          |
| nucelolus vs centrosome              | 390.9           | No           | ns      | >0.9999          |
| nucelolus vs ER area                 | 1691            | Yes          | ****    | <0.0001          |
| vesicles vs mitochondria             | -2124           | Yes          | ****    | <0.0001          |
| vesicles vs nucleus                  | -2219           | Yes          | ****    | <0.0001          |
| vesicles vs Golgi                    | -1436           | Yes          | ****    | <0.0001          |
| vesicles vs vacuoles                 | -716.6          | Yes          | ****    | <0.0001          |
| vesicles vs lamellar inclusion       | -1175           | Yes          | ****    | <0.0001          |
| vesicles vs cell cell connection     | -490.3          | Yes          | *       | 0.0212           |
| vesicles vs centrosome               | -2713           | Yes          | ****    | <0.0001          |
| vesicles vs ER area                  | -1413           | Yes          | ****    | <0.0001          |
| mitochondria vs nucleus              | -94.61          | No           | ns      | >0.9999          |
| mitochondria vs Golgi                | 688.8           | Yes          | ****    | <0.0001          |
| mitochondria vs vacuoles             | 1408            | Yes          | ****    | <0.0001          |
| mitochondria vs lamellar inclusion   | 949.5           | Yes          | ****    | <0.0001          |
| mitochondria vs cell cell connection | 1634            | Yes          | ****    | <0.0001          |
| mitochondria vs centrosome           | -588.7          | No           | ns      | 0.3017           |
| mitochondria vs ER area              | 711.1           | Yes          | ****    | <0.0001          |
| nucleus vs Golgi                     | 783.4           | Yes          | ****    | <0.0001          |
| nucleus vs vacuoles                  | 1502            | Yes          | ****    | <0.0001          |
| nucleus vs lamellar inclusion        | 1044            | Yes          | ****    | <0.0001          |
| nucleus vs cell cell connection      | 1729            | Yes          | ****    | <0.0001          |
| nucleus vs centrosome                | -494.1          | No           | ns      | >0.9999          |
| nucleus vs ER area                   | 805.7           | Yes          | ****    | <0.0001          |
| Golgi vs vacuoles                    | 719             | Yes          | ****    | <0.0001          |
| Golgi vs lamellar inclusion          | 260.7           | No           | ns      | >0.9999          |
| Golgi vs cell cell connection        | 945.3           | Yes          | ****    | <0.0001          |
| Golgi vs centrosome                  | -1278           | Yes          | ****    | <0.0001          |
| Golgi vs ER area                     | 22.29           | No           | ns      | >0.9999          |
| vacuoles vs lamellar inclusion       | -458.3          | Yes          | ****    | <0.0001          |
| vacuoles vs cell cell connection     | 226.3           | No           | ns      | >0.9999          |
| vacuoles vs centrosome               | -1996           | Yes          | ****    | <0.0001          |

|                                            |        |     |      |         |
|--------------------------------------------|--------|-----|------|---------|
| vacuoles vs ER area                        | -696.7 | Yes | **** | <0.0001 |
| lamellar inclusion vs cell cell connection | 684.6  | Yes | **** | <0.0001 |
| lamellar inclusion vs centrosome           | -1538  | Yes | **** | <0.0001 |
| lamellar inclusion vs ER area              | -238.4 | No  | ns   | 0.1123  |
| cell cell connection vs centrosome         | -2223  | Yes | **** | <0.0001 |
| cell cell connection vs ER area            | -923   | Yes | **** | <0.0001 |
| centrosome vs ER area                      | 1300   | Yes | **** | <0.0001 |

## Reference

- 1 Bell S, Hettige NC, Silveira H, Peng H, Wu H, Jefri M, Antonyan L, Zhang Y, Zhang X, Ernst C. Differentiation of Human Induced Pluripotent Stem Cells (iPSCs) into an Effective Model of Forebrain Neural Progenitor Cells and Mature Neurons. *Bio Protoc.* Mar 5;9(5):e3188 (2019).
- 2 Fornasiero E.F., Mandad S., Wildhagen H. et al. Precisely measured protein lifetimes in the mouse brain reveal differences across tissues and subcellular fractions. *Nat Commun* **9**, 4230 (2018).
- 3 Cohen LD, Zuchman R, Sorokina O, et al. Metabolic turnover of synaptic proteins: kinetics, interdependencies and implications for synaptic maintenance. *PLoS One.* **2**, 8, 5, e63191 (2013).
